# Supplementary material for: Defective type I interferon immunity is associated with increasing COVID-19 severity
Source: Research Square preprint supplement (doi:10.21203/rs.3.rs-1685544/v1), 2022-06-16
Supplement: Supplementary file 1 [file 4faf3e7cbffe1c8f15ee793b.xlsx]

## Sheet: Table S7 IFNa induced genes
Table S7 List of nanostring genes differentially induced between Null and IFNa
stimualtions accross all donors and patients
Genes
CCL8	IL27	TRIM21	KPNB1	TBXAS1
CXCL10	MX2	MARCKS	PSMB9	SELE
IFIT1	CASP5	CCL1	JAK2	KLRB1
RSAD2	AIM2	TAP2	MYD88	ULK1
ISG15	UBE2L6	CCL13	CYSTM1	JUN
IFIT3	CD274	C3AR1	FCGR1A/B	TGFB3
OAS3	DTX3L	IRG1/ACOD1	CASP10	IL5
CXCL11	STAT1	SCARB2	LILRA6	LIF
IFI6	GBP1	NTNG2	P2RX7	IL9R
MX1	IFI27	MT2A	CCL17	ACOX1
HERC5	TRIM22	CCR5	PSMB8	IFNA6
IFI44	IFITM1	CD68	HLA-A	CD276
OAS1	STAT2	CARD17	PLAUR	IL1R2
IFIT2	BST2	CASP1	RNF31	CCL20
CCL2	TLR3	TAP1	MAFB	IL20RB
TNFSF10	CCL7	RIPK2	LTBR	NCR3
OASL	C2	CD69	HLA-DRA	VWF
XAF1	TRIM5	IFITM2	MS4A2	IL17C
IFI35	CCR1	LILRA3	C5	CCL22
IDO1	CCRL2	IRF5	CUL1	IFNL2/3
DHX58	LAG3	CCL18	CXCL16	CXCR2
IL1RN	TRIM6	CCL3/L1/L3	HLA-B	IL1R1
CD80	IFI16	RBCK1	DDIT3	IFNA4/7/10/17/21
OAS2	CTSL	IL34	CD1E	CCR8
TCN2	GBP4	CD86	NLRP3	S100A12
TNFSF13B	ISG20	MEFV	CD40	IL1RL2
IRF7	APOL6	SOCS1	FAS	LTA4H
PARP9	CYP2E1	MLKL	IFNA1/13	PC
EIF2AK2	PLAU	NLRC5	EGLN1	CXCL5
IFIH1	CD38	TNFSF18	ACKR2	IL23A
MS4A4A	IL15	CARD16	CXCL6	JAML
FBXO6	TRIM25	CASP4	IL11RA	PLIN4
TLR7	C3	CGAS	ADORA2A	FCRL4
LAMP3	GBP5	APOBEC3G	SLC11A1	CR1
DDX58	CDKN1A	TMEM140	FCGRT	THBS1
ZBP1	ADAR	TRIM56	ANPEP	ITGAM
IFITM3	IRF9	LILRA5	CCL14	MGAM
	SP100	MS4A7	PSTPIP1	CXCL3
	HAVCR2	HLA-DPA1	ALOX5AP	CCL24
		HLA-DRB	NT5E	MRC1
				ITGAE
				ALPL
				MME
