# Supplementary material for: Defective type I interferon immunity is associated with increasing COVID-19 severity
Source: Research Square preprint supplement (doi:10.21203/rs.3.rs-1685544/v1), 2022-06-16
Supplement: Supplementary file 2 [file 586c85e07c59e86cc8a89c11.xlsx]

## Sheet: Table S2 Cohort 1
Table S2 Cohort 1
Cohort ID	Age	Sex	Severity	Need for Supplemental O2 (0 no, 1 yes)	Débit 02 max	Date of Inclusion	Date of symptoms	Date PCR	Days post-symptoms
1.1	31	F	Moderate	0	0	2020-03-25	2020-03-21	2020-03-24	4
1.2	61.4264	M	Critical	1	12	2020-04-01	2020-03-20	2020-03-27	12
1.3	44.898	M	Moderate	1	2	2020-03-19	2020-03-10	2020-03-17	9
1.4	46.0808	F	Severe	1	4	2020-03-19	2020-03-10	2020-03-18	9
1.5	31.1266	M	Moderate	1	1	2020-03-19	2020-03-10	2020-03-15	9
1.6	38.3792	M	Moderate	1	3	2020-03-20	2020-03-09	2020-03-15	11
1.7	52.4271	M	Moderate	1	1.5	2020-03-20	2020-03-11	2020-03-19	9
1.8	25.6619	M	Moderate	1	3	2020-03-20	2020-03-11	2020-03-18	9
1.9	51.0363	M	Moderate	0	0	2020-03-23	2020-03-13	2020-03-20	10
1.10	48.7228	M	Severe	1	4	2020-03-23	2020-03-13	2020-03-20	10
1.11	64.3559	M	Moderate	1	2	2020-03-23	2020-03-12	2020-03-21	11
1.12	55.8658	F	Moderate	0	0	2020-03-23	2020-03-14	2020-03-21	9
1.13	47.7728	M	Severe	1	5	2020-03-23	2020-03-13	2020-03-23	10
1.14	61.6537	M	Severe	1	4	2020-03-24	2020-03-13	2020-03-22	11
1.15	65.8261	M	Moderate	1	1	2020-03-24	2020-03-15	2020-03-21	9
1.16	59.8357	M	Severe	1	5	2020-03-24	2020-03-12	2020-03-13	12
1.17	71.2252	F	Moderate	1	2	2020-03-24	2020-03-14	2020-03-22	10
1.18	60.3751	M	Moderate	1	3	2020-03-26	2020-03-17	2020-03-24	9
1.19	45.7878	M	Severe	1	5	2020-03-26	2020-03-17	2020-03-23	9
1.20	62.026	F	Moderate	2	3	2020-03-26	2020-03-18	2020-03-24	8
1.21	48.7337	M	Moderate	1	2	2020-03-27	2020-03-13	2020-03-20	14
1.22	49.9165	M	Moderate	1	2	2020-03-30	2020-03-19	2020-03-28	11
1.23	51.9452	M	Severe	1	5	2020-03-30	2020-03-19	2020-03-27	11
1.24	58.6119	M	Severe	1	4	2020-03-31	2020-03-21	2020-03-29	10
1.25	41.1362	M	No disease	0	0	2020-03-19	NA	NA	NA
1.26	40.1697	M	No disease	0	0	2020-03-20	NA	NA	NA
1.27	46.4778	F	No disease	0	0	2020-03-20	NA	NA	NA
1.28	58.7871	M	No disease	0	0	2020-03-20	NA	NA	NA
1.29	28.2847	M	No disease	0	0	2020-03-20	NA	NA	NA
1.30	60.0192	M	No disease	0	0	2020-03-23	NA	NA	NA
1.31	59.6003	M	No disease	0	0	2020-03-23	NA	NA	NA
1.32	54.809	M	No disease	0	0	2020-03-24	NA	NA	NA
1.33	33.6728	M	No disease	0	0	2020-03-24	NA	NA	NA
1.34	59.603	F	No disease	0	0	2020-03-24	NA	NA	NA
1.35	70.4531	M	No disease	0	0	2020-03-27	NA	NA	NA
1.36	44.2437	F	No disease	0	0	2020-03-30	NA	NA	NA
1.37	33.243	F	No disease	0	0	2020-03-30	NA	NA	NA
1.38	65.5797	M	No disease	0	0	2020-03-31	NA	NA	NA
1.39	79	M	Severe	1	6	2020-03-19	2020-03-09	2020-03-15	10
1.40	55.1759	F	Critical	1	>6	2020-03-19	2020-03-11	2020-03-18	8
1.41	79.1841	F	Critical	1	>6	2020-03-19	2020-03-10	2020-03-17	9
1.42	76.9336	M	Critical	1	>6	2020-03-20	2020-03-10	2020-03-14	10
1.43	63.0472	M	Critical	1	>6	2020-03-20	2020-03-10	2020-03-15	10
1.44	54.3792	M	Critical	1	>6	2020-03-20	2020-03-12	2020-03-14	8
1.45	51.1978	M	Critical	1	>6	2020-03-23	2020-03-14	2020-03-20	9
1.46	55.1211	M	Severe	1	5	2020-03-24	2020-03-14	2020-03-23	10
1.47	55.154	M	Critical	1	>6	2020-03-24	2020-03-13	2020-03-22	11
1.48	40.9117	M	Severe	1	6	2020-03-24	2020-03-12	2020-03-22	12
1.49	54.2587	F	Critical	1	>6	2020-03-24	2020-03-16	2020-03-21	8
1.50	60.2382	M	Critical	1	>6	2020-03-24	2020-03-16	2020-03-24	8
1.51	76	M	Critical	1	>6	NA	NA	NA	NA
1.52	55.5346	M	Critical	1	>6	2020-03-26	2020-03-16	2020-03-24	10
1.53	63.3922	M	Severe	1	9	2020-03-26	2020-03-18	2020-03-23	8
1.54	59.948	M	Critical	1	5	2020-03-26	2020-03-15	2020-03-24	11
1.55	55.1294	M	Critical	1	>6	2020-03-27	2020-03-14	2020-03-23	13
1.56	66.9487	F	Critical	1	>7	2020-03-27	2020-03-16	2020-03-23	11
1.57	55.1622	M	Critical	1	>8	2020-03-27	2020-03-13	2020-03-22	14
1.58	76.9528	M	Critical	1	>9	2020-03-27	2020-03-10	2020-03-14	17
1.59	51.2088	M	Critical	1	>10	2020-03-27	2020-03-16	2020-03-20	11
1.60	54.3984	M	Critical	1	>11	2020-03-27	2020-03-12	2020-03-14	15
1.61	76.3833	M	Critical	1	>12	2020-03-27	2020-03-15	2020-03-23	12
1.62	52.0219	M	Critical	1	>13	2020-03-30	2020-03-21	2020-07-26	9
1.63	62.6229	M	Critical	1	>14	2020-03-30	2020-03-20	2020-03-26	10
1.64	75.7864	M	Critical	1	>15	2020-03-30	2020-03-19	2020-03-26	11
1.65	62.7981	M	Critical	1	>16	2020-03-30	2020-03-20	2020-03-29	10
1.66	52.3258	M	Critical	1	>17	2020-03-30	2020-03-18	2020-03-29	12
1.67	50.1465	M	Critical	1	>18	2020-03-30	2020-03-21	2020-03-27	9
1.68	51.4196	M	Critical	1	15	2020-03-31	2020-03-19	2020-03-31	12
1.69	45.1143	F	Severe	1	12	2020-03-31	2020-03-23	2020-03-31	8
