# Supplementary material for: Defective type I interferon immunity is associated with increasing COVID-19 severity
Source: Research Square preprint supplement (doi:10.21203/rs.3.rs-1685544/v1), 2022-06-16
Supplement: Supplementary file 3 [file b2566ca465d92d5609b73278.xlsx]

## Sheet: Table S4 Cohort 3
Table S4 Cohort 3
Cohort ID	Age	Sex	Severity	Need for Supplemental O2 (0 no, 1 yes)	Date of sample	Date of admission	Date of onset of symptoms
3.1	29	M	Severe	0	2020-03-20	2020-03-18	2020-03-15
3.2	84	F	Critical	1	2020-04-02	2020-03-31	2020-03-26
3.3	92	F	Critical	1	2020-04-03	2020-03-04	2020-03-30
3.4	81	F	Moderate	0	2020-03-18	2020-03-15	2020-03-13
3.5	52	F	Critical	1	2020-03-23	2020-03-19	2020-03-14
3.6	67	M	Critical	1	2020-03-25	2020-03-23	2020-03-19
3.7	73	M	Critical	1	2020-03-30	2020-03-26	2020-03-22
3.8	37	F	Severe	1	2020-04-01	2020-03-29	2020-03-24
3.9	29	M	Severe	1	2020-04-01	2020-03-30	2020-03-23
3.10	46	F	Critical	1	2020-03-31	2020-03-30	2020-03-21
3.11	72	M	Critical	1	2020-04-28	2020-04-25	2020-04-23
3.12	63	F	Severe	1	2020-04-30	2020-04-04	2020-04-26
3.13	56	M	Critical	1	2020-04-13	2020-02-23	2020-04-07
3.14	85	M	Severe	1	2020-05-07	2020-04-03	2020-04-30
3.15	40	M	Moderate	0	2020-03-18	2020-03-15	2020-03-14
3.16	43	M	Critical	1	2020-03-23	2020-03-19	2020-03-14
3.17	81	M	Moderate	0	2020-03-23	2020-03-19	2020-03-14
3.18	48	M	Severe	1	2020-03-24	2020-03-24	2020-03-23
3.19	59	F	Critical	1	2020-03-24	2020-03-22	2020-03-20
3.20	45	F	Severe	1	2020-04-01	2020-03-30	2020-03-23
3.21	66	M	Critical	1	2020-03-29	2020-03-23	2020-03-10
3.22	28	M	Severe	0	2020-04-02	2020-04-01	2020-03-27
3.23	52	M	Critical	1	2020-04-08	2020-04-05	2020-03-29
3.24	53	M	Critical	1	2020-04-05	2020-04-02	2020-03-25
3.25	65	M	Critical	1	2020-04-20	2020-04-19	2020-04-14
3.26	30	M	Moderate	OPD	2020-04-21	OPD	2020-04-11
3.27	39	M	Moderate	OPD	2020-05-26	OPD	2020-04-06
3.28	57	F	Moderate	0	2020-06-16	2020-04-11	2020-04-24
3.29	61	M	Critical	1	2020-04-14	2020-04-07	2020-04-03
3.30	24	F	Moderate	OPD	2020-05-06	OPD	2020-04-29
3.31	71	F	Severe	1	2020-03-24	2020-03-22	2020-03-20
3.32	67	M	Critical	1	2020-03-27	2020-03-28	2020-03-21
3.33	41	F	Moderate	0	2020-03-27	2020-03-26	2020-03-18
3.34	56	F	Critical	1	2020-03-27	2020-03-23	2020-03-15
3.35	64	F	Moderate	OPD	2020-04-08	OPD	2020-04-06
3.36	38	M	Moderate	OPD	2020-04-07	OPD	2020-03-31
3.37	54	F	Moderate	OPD	2020-04-09	OPD	2020-04-07
3.38	28	M	Moderate	OPD	2020-04-22	OPD	2020-04-20
3.39	53	F	Moderate	OPD	2020-04-27	OPD	2020-04-17
3.40	21	F	Moderate	OPD	2020-06-10	OPD	2020-04-20
3.41	86	F	Moderate	0	2020-04-29	2020-04-11	2020-04-27
3.42	84	F	Moderate	0	2020-04-07	2020-04-04	2020-03-29
3.43	31	F	Moderate	OPD	2020-04-07	OPD	2020-03-30
3.44	24	M	Moderate	OPD	2020-05-06	OPD	2020-05-02
3.45	80	F	Moderate	0	2020-03-30	2020-02-13	2020-03-27
3.46	35	M	Critical	1	2020-04-03	2020-04-01	2020-03-26
3.47	35	M	Moderate	0	2020-04-03	2020-04-01	2020-03-20
3.48	59	F	Moderate	OPD	2020-04-07	OPD	2020-04-01
3.49	66	M	Critical	1	2020-04-10	2020-04-04	2020-03-30
3.50	47	M	Moderate	1	2020-06-10	2020-04-17	2020-04-03
3.51	27	F	Moderate	OPD	2020-04-30	OPD	2020-04-25
3.52	49	M	Moderate	1	2020-05-08	2020-05-01	2020-04-27
3.53	41	F	Moderate	0	2020-05-08	2020-03-31	2020-03-27
3.54	34	F	Severe	1	2020-03-20	2020-03-18	2020-03-11
3.55	80	F	Moderate	0	2020-03-20	2019-12-13	2020-03-10
3.56	61	M	Critical	1	2020-03-23	2020-03-18	2020-03-14
3.57	71	M	Severe	1	2020-04-03	2020-03-26	2020-03-24
3.58	82	M	Moderate	0	2020-04-08	2020-04-05	2020-03-30
3.59	52	F	Moderate	OPD	2020-04-09	OPD	2020-04-06
3.60	34	F	Moderate	OPD	2020-04-09	OPD	2020-04-02
3.61	69	M	Critical	1	2020-04-10	2020-04-02	2020-03-25
3.62	54	M	Moderate	OPD	2020-04-21	OPD	2020-04-13
3.63	49	M	Moderate	OPD	2020-06-24	OPD	2020-04-17
3.64	86	M	Critical	1	2020-06-17	2020-04-19	2020-04-15
3.65	73	F	Critical	1	2020-04-29	2020-04-17	2020-04-12
3.66	88	M	Severe	1	2020-04-29	2020-04-07	2020-04-25
3.67	67	M	Critical	1	2020-04-23	2020-04-20	2020-04-10
3.68	33	M	Critical	1	2020-04-08	2020-04-04	2020-04-04
3.69	59	F	Critical	1	2020-04-09	2020-04-03	2020-03-27
3.70	71	M	Severe	1	2020-05-07	2020-05-04	2020-04-29
3.71	91	F	Moderate	0	2020-05-08	2020-04-23	2020-04-23
3.72	56	M	Severe	0	2020-03-25	2020-03-24	2020-03-10
3.73	89	M	Critical	1	2020-04-01	2020-03-30	2020-03-28
3.74	61	M	Moderate	1	2020-04-01	2020-03-30	2020-03-28
3.75	63	M	Critical	1	2020-03-29	2020-03-24	2020-03-14
3.76	84	M	Moderate	0	2020-04-03	2020-02-13	2020-04-02
3.77	70	M	Severe	1	2020-04-03	2020-03-27	2020-03-20
3.78	72	M	Severe	1	2020-04-03	2020-03-25	2020-03-21
3.79	72	F	Critical	1	2020-04-03	2020-03-31	2020-03-24
3.80	63	M	Moderate	0	2020-04-10	2020-04-08	2020-03-29
3.81	50	F	Critical	1	2020-03-30	2020-03-24	2020-03-19
3.82	78	F	Severe	1	2020-05-07	2020-04-14	2020-04-20
3.83	48	F	Moderate	OPD	2020-04-24	OPD	2020-04-21
3.84	28	M	Critical	1	2020-04-09	2020-04-07	2020-04-03
3.85	44	M	Critical	1	2020-04-14	2020-04-06	2020-04-01
3.86	88	M	Moderate	0	2020-03-27	2019-11-09	2020-03-25
3.87	31	M	Critical	1	2020-04-02	2020-03-31	2020-03-25
3.88	41	M	Critical	1	2020-04-13	2020-04-12	2020-04-09
3.89	74	F	Moderate	0	2020-04-29	2020-04-14	2020-04-22
3.90	86	F	Severe	1	2020-04-29	2020-03-19	2020-04-26
3.91	62	F	Moderate	0	2020-04-30	2020-04-17	2020-04-22
3.92	77	F	Critical	1	2020-04-01	2020-03-24	2020-03-18
3.93	62	M	Critical	1	2020-03-31	2020-03-22	2020-03-16
3.94	52	M	Critical	1	2020-04-20	2020-04-14	2020-04-12
3.95	69	F	Moderate	0	2020-03-30	2020-01-30	2020-03-27
3.96	60	M	Critical	1	2020-03-30	2020-03-22	2020-03-16
3.97	21	F	Critical	1	2020-04-09	2020-04-08	2020-03-31
3.98	54	M	Critical	1	2020-03-31	2020-03-18	2020-03-10
3.99	80	M	Critical	1	2020-03-31	2020-03-29	2020-03-17
3.100	81	M	Severe	1	2020-04-03	2020-03-29	2020-03-26
3.101	66	M	Critical	1	2020-03-30	2020-03-20	2020-03-17
3.102	66	M	Moderate	1	2020-03-13	2020-03-18	2020-03-07
3.103	60	M	Critical	1	2020-03-30	2020-03-20	2020-03-27
3.104	39	M	Critical	1	2020-04-01	2020-03-25	2020-03-22
3.105	59	F+C112	Critical	1	2020-04-01	2020-03-27	2020-03-21
3.106	80	F	Critical	1	2020-03-24	2020-03-20	2020-03-18
3.107	78	M	Critical	1	2020-03-30	2020-02-19	2020-03-20
3.108	71	M	Critical	1	2020-03-27	2020-03-23	2020-03-20
3.109	77	F	Moderate	0	2020-03-27	2020-02-19	2020-03-23
3.110	75	M	Critical	1	2020-03-27	2020-03-24	2020-03-21
3.111	66	M	Critical	1	2020-03-30	2020-03-26	2020-03-23
3.112	74	F	Critical	1	2020-03-30	2020-03-23	2020-03-16
3.113	67	F	Critical	1	2020-04-03	2020-03-31	2020-03-29
3.114	55	M	Critical	1	2020-04-05	2020-04-04	2020-03-26
3.115	66	M	Critical	1	2020-04-02	2020-03-31	2020-03-24
3.116	68	M	Critical	1	2020-04-09	2020-04-03	2020-03-28
3.117	58	M	Critical	1	2020-03-29	2020-03-27	2020-03-19
3.118	63	M	Critical	1	2020-03-30	2020-03-11	2020-03-15
3.119	65	F	Critical	1	2020-04-14	2020-04-13	2020-04-07
3.120	75	F	Critical	1	2020-04-20	2020-04-15	2020-04-05
3.121	61	F	Critical	1	2020-04-20	2020-04-19	2020-04-03
3.122	69	M	Moderate	0	2020-04-27	2019-12-16	2020-04-19
3.123	81	F	Severe	1	2020-04-29	2020-04-07	2020-04-06
3.124	87	M	Moderate	0	2020-05-06	2020-05-05	2020-05-02
3.125	71	M	Moderate	0	2020-05-08	2020-03-23	2020-03-20
3.126	90	F	Moderate	0	2020-05-08	2020-05-10	2020-04-25
3.127	46	M	Critical	1	2020-05-11	2020-05-05	2020-04-28
3.128	89	F	Moderate	0	2020-05-11	2020-04-23	2020-05-09
3.129	81	F	Moderate	0	2020-05-11	2020-04-26	2020-05-07
3.130	27	F	Moderate	OPD	2020-05-13	OPD	2020-05-09
3.131	64	F	Moderate	OPD	2020-05-13	OPD	2020-05-10
3.132	30	F	Moderate	OPD	2020-06-10	OPD	2020-05-10
3.133	48	M	Moderate	OPD	2020-05-20	OPD	2020-05-10
3.134			Moderate	OPD			2020-05-18
3.135	25	M	Healthy	0	2020-05-26	HC	HC
3.136	30	M	Healthy	0	2020-05-26
3.137	58	M	Critical	1	2020-05-27	2020-03-28	2020-03-18
3.138	71	M	Moderate	0	2020-05-28	2020-03-25	2020-03-17
3.139	64	F	Moderate	0	2020-05-28	2020-03-28	2020-03-27
3.140	53	M	Moderate	0	2020-05-28	2020-03-23	2020-03-21
3.141	55	F	Moderate	0	2020-05-28
3.142	45	M	Severe	1	2020-05-28
3.143	33	M	Moderate	0	2020-05-28		2020-03-19
3.144	30	M	Healthy	0	2020-05-28	HC	HC
3.145	62	F	Moderate	0	2020-05-28
3.146	62	F	Moderate	0	2020-05-28
3.147	62	F	Healthy	0	2020-06-02	HC	HC
3.148	49	F	Moderate	0	2020-06-04		2020-04-18
3.149	65	F	Severe	1	2020-06-04	2020-04-21	2020-04-15
3.150	61	M	Critical	1	2020-06-04	2020-03-23	2020-03-09
3.151	64	M	Moderate	0	2020-06-05	OPD	2020-04-02
3.152	83	F	Moderate	0	2020-06-04	2020-03-22	2020-03-19
3.153	22	F	Moderate	0	2020-06-04	2020-03-17	2020-03-14
3.154	74	M	Moderate	0	2020-06-04	2020-03-20	2020-03-14
3.155	32	F	Healthy	0	2020-06-08
3.156	33	F	Healthy	0	2020-06-08	HC	HC
3.157	57	M	Moderate	0	2020-06-10	OPD	2020-04-02
3.158	39	F	Moderate	0	2020-06-10	OPD	2020-03-18
3.159	23	F	Moderate	0	2020-06-10	OPD	2020-04-10
3.160	44	F	Moderate	0	2020-06-11
3.161	24	M	Moderate	0	2020-06-10	OPD	2020-03-26
3.162	27	F	Moderate	0	2020-06-09	OPD	2020-04-01
3.163	55	M	Critical	1	2020-06-11
3.164	45	F	Moderate	0	2020-06-11
3.165	36	F	Moderate	0	2020-06-11
3.166	29	F	Moderate	0	2020-06-10
3.167	51	F	Moderate	0	2020-06-10	OPD	2020-04-27
3.168	41	F	Moderate	0	2020-06-11
3.169	29	M	Moderate	0	2020-06-15
3.170	33	F	Moderate	0	2020-06-18
3.171	35	F	Moderate	0	2020-06-18
3.172	42	M	Moderate	0	2020-06-17
3.173	42	F	Moderate	0	2020-06-16
3.174	53	F	Moderate	0	2020-06-16	OPD	2020-04-15
3.175	23	F	Moderate	0	2020-06-16
3.176	73	M	Moderate	0	2020-06-18
3.177	45	M	Moderate	0	2020-06-16	OPD	2020-04-24
3.178	59	F	Moderate	0	2020-06-16
3.179	27	F	Moderate	0	2020-06-15	OPD	2020-03-21
3.180	29	F	Healthy	0	2020-06-15	HC	HC
3.181	56	F	Healthy	0	2020-06-15	HC	HC
3.182	36	M	Moderate	0	2020-06-16
3.183	32	F	Healthy	0	2020-06-23	HC	HC
3.184	26	F	Moderate	0	2020-06-26
3.185	38	F	Moderate	0	2020-06-26
3.186	30	F	Moderate	0	2020-06-26
3.187	36	F	Moderate	0	2020-06-26
3.188	42	M	Critical	1	2020-06-26
3.189	43	F	Severe	1	2020-06-26
3.190	39	M	Moderate	0	2020-06-26	OPD	2020-03-06
3.191	56	F	Healthy	0	2020-06-26	HC	HC
3.192	56	M	Healthy	0	2020-06-24	HC	HC
3.193	65	F	Healthy	0	2020-06-24	HC	HC
3.194			Moderate	0
3.195			Moderate	0
3.196	31	F	Moderate	0	2020-07-01
3.197	35	M	Moderate	0	2020-07-01
3.198	57	F	Moderate	0	2020-07-01
3.199	82	M	Severe	1	2020-07-01
3.200	34	M	Moderate	0	2020-07-01
3.201	84	F	Healthy	0	2020-06-03	HC	HC
3.202	79	M	Moderate	0	2020-06-03
3.203	77	F	Healthy	0	2020-06-03	HC	HC
3.204	60	F	Moderate	0	2020-07-07	OPD	2020-04-13
3.205	43	F	Moderate	0	2020-07-08	OPD	2020-03-20
3.206	81	M	Moderate	0	2020-07-08	2020-04-19	2020-04-18
3.207	68	M	Moderate	0	2020-07-08	2020-04-15	2020-04-14
3.208	56	M	Healthy	0	2020-06-13	HC	HC
3.209	65	F	Healthy	0	2020-06-13	HC	HC
3.210	73	F	Healthy	0	2020-06-13	HC	HC
3.211	71	F	Healthy	0	2020-06-13	HC	HC
3.212	51	F	Moderate	0	2020-07-14
3.213	37	F	Moderate	0	2020-07-14
3.214	48	F	Moderate	0	2020-07-14
3.215	50	F	Moderate	0	2020-07-14
3.216	42	F	Moderate	0	2020-07-15
3.217	58	F	Moderate	0	2020-07-15
3.218	49	M	Moderate	0	2020-07-15
3.219	48	F	Moderate	0	2020-07-15
3.220	43	F	Moderate	0	2020-07-15
3.221	35	F	Moderate	0	2020-07-15
3.222	48	F	Moderate	0	2020-07-15
3.223	46	F	Moderate	0	2020-07-15
3.224	46	F	Moderate	0	2020-06-17
3.225	45	M	Moderate	0	2020-06-17
3.226	33	F	Moderate	0	2020-06-17
3.227	28	F	Moderate	0	2020-06-17
3.228	46	F	Moderate	0	2020-07-22
3.229	42	F	Moderate	0	2020-07-22
3.230	32	M	Moderate	0	2020-07-22
