# Supplementary material for: Defective type I interferon immunity is associated with increasing COVID-19 severity
Source: Research Square preprint supplement (doi:10.21203/rs.3.rs-1685544/v1), 2022-06-16
Supplement: Supplementary file 4 [file b59b84e4d83f190249bd22ce.xlsx]

## Sheet: Table S5 Cohort 4
Table S5 Cohort 4
Cohort ID	Age	Sex	Hospital	Severity	Need for Supplemental O2 (0 no, 1 yes)	Oxygen saturation	Oxygen Flow (L/min)	FiO2 (%)	Date of samples	Date of Admission
4.1	75	M	Cochin	Severe	1	NA	NA	NA	2020-11-24	2020-11-20
4.2	76	M	Cochin	Severe	1	NA	NA	NA	2020-11-24	2020-11-23
4.3	89	M	Cochin	Severe	1	NA	NA	NA	2020-11-26	2020-11-13
4.4	75	M	Cochin	Severe	1	NA	NA	NA	2020-11-26	2020-11-20
4.5	89	M	Cochin	Severe	1	NA	NA	NA	2020-11-26	2020-11-25
4.6	81	F	Cochin	Severe	1	NA	NA	NA	2020-11-26	2020-10-22
4.7	77	M	Cochin	Severe	1	NA	NA	NA	2020-12-09	2020-12-07
4.8	86	F	Cochin	Severe	1	NA	NA	NA	2020-12-09	2020-12-05
4.9	47	F	Cochin	Severe	1	NA	NA	NA	2020-12-09	2020-12-04
4.10	86	F	Cochin	Severe	1	NA	NA	NA	2020-12-16	2020-12-05
4.11	53	M	Cochin	Critical	1	NA	NA	NA	2020-12-16	2020-12-11
4.12	62	M	Cochin	Critical	1	NA	NA	NA	2021-02-10	2021-02-04
4.13	79	M	Cochin	Critical	1	NA	NA	NA	2021-02-10	2021-02-08
4.14	61	F	Cochin	Critical	1	NA	NA	NA	2021-02-24	2021-02-22
4.15	63	M	Cochin	Critical	1	NA	NA	NA	2021-02-24	2021-02-16
4.16	53	F	Cochin	Critical	1	NA	NA	NA	2021-02-24	2021-02-22
4.17	73	F	Bichat	Severe	1	97	1	NA	NA	NA
4.18	80	M	Bichat	Critical	1	98	15	NA	NA	NA
4.19	81	M	Bichat	Critical	1	97	15	NA	NA	NA
4.20	51	M	Bichat	Critical	1	94	15	21	NA	NA
4.21	59	F	Bichat	Critical	1	85	15	21	NA	NA
4.22	75	F	Bichat	Critical	1	95	12	21	NA	NA
4.23	72	M	Bichat	Critical	1	100	9	100	NA	NA
4.24	71	M	Bichat	Critical	1	95	30	21	NA	NA
4.25	57	M	Bichat	Critical	1	98	60	80	NA	NA
4.26	78	M	Bichat	Critical	1	94	15	80	NA	NA
4.27	78	M	Bichat	Critical	1	95	15	70	NA	NA
4.28	51	M	Bichat	Critical	1	91	60	90	NA	NA
4.29	66	F	Bichat	Critical	1	100	60	80	NA	NA
4.30	52	M	Bichat	Critical	1	91	60	70	NA	NA
4.31	48	M	Bichat	Critical	1	97	NA	NA	NA	NA
