# Supplementary material for: Defective type I interferon immunity is associated with increasing COVID-19 severity
Source: Research Square preprint supplement (doi:10.21203/rs.3.rs-1685544/v1), 2022-06-16
Supplement: Supplementary file 5 [file c5882a4c4b2c04a4233d00a6.xlsx]

## Sheet: Table S3 Cohort 2
Table S3 Cohort 2
Cohort ID	Age	Sex	Severity
2.1	84	M	Critical
2.2	74	M	Severe
2.3	53	F	Severe
2.4	75	M	Severe
2.5	57	M	Severe
2.6	50	M	Critical
2.7	70	M	Critical
2.8	66	F	Critical
2.9	75	M	Severe
2.10	60	F	Critical
2.11	75	M	Critical
2.12	88	F	Moderate
2.13	85	F	Severe
2.14	50	M	Severe
2.16	76	M	Moderate
2.17	78	M	Critical
2.18	77	M	Critical
2.19	78	M	Moderate
2.20	87	F	Severe
2.21	48	F	Severe
2.22	69	M	Moderate
2.23	86	M	Severe
2.24	54	M	Critical
2.25	69	F	Critical
2.26	75	M	Critical
2.27	82	F	Severe
2.28	95	M	Moderate
2.29	56	F	Moderate
2.30	69	F	Severe
2.31	65	M	Critical
2.32	36	M	Critical
2.33	67	M	Moderate
2.34	63	M	Severe
2.35	70	M	Moderate
2.36	57	F	Severe
2.37	58	M	Critical
2.38	75	M	Critical
2.39	77	M	Severe
2.40	61	F	Critical
2.41	72	M	Critical
2.42	72	F	Severe
2.43	67	F	Severe
2.44	73	F	Moderate
2.45	66	M	Moderate
2.46	78	F	Severe
2.47	39	M	Moderate
2.48	56	M	Critical
2.49	79	M	Severe
2.50	62	M	Severe
2.51	82	F	Moderate
2.53	64	M	Critical
2.54	61	F	Moderate
2.55	51	M	Moderate
2.56	68	M	Moderate
2.57	64	F	Moderate
2.58	55	M	Moderate
2.59	73	M	Severe
2.60	46	M	Moderate
2.62	64	F	Moderate
2.63	30	F	Moderate
2.64	49	M	Moderate
2.65	42	F	Moderate
2.66	54	F	Moderate
2.67	75	M	Moderate
2.68	45	M	Moderate
2.69	100	M	Moderate
2.70	35	M	Moderate
2.71	50	F	Severe
2.72	43	M	Moderate
2.73	67	M	Moderate
2.74	51	M	Severe
2.75	66	F	Moderate
2.76	57	M	Severe
2.77	71	F	Moderate
2.78	61	M	Severe
