# Supplementary material for: Defective type I interferon immunity is associated with increasing COVID-19 severity
Source: Research Square preprint supplement (doi:10.21203/rs.3.rs-1685544/v1), 2022-06-16
Supplement: Supplementary file 6 [file f0c19586d9324299a7c89dc0.xlsx]

## Sheet: Table S1 Patient cohort summary
	Table S1 Numbers of patients and healthy controls included in the different immunological analysis
N°	Clinical Cohort	Sample type	Table	Healthy controls	Non-hospitalized COVID-19	Hospitalized COVID-19:				Figures	Age range yrs (min-max, mean)	Sex (F:M %)
							(Moderate	Severe	Critical)
1	Hopital Cochin, Paris	Plasma samples - 1rst cohort	Table S2	14	-	55	15	13	27	Fig 1a-i	26-79, 55	20:80%
2	Hopital Cochin, Paris	Plasma samples - 2nd cohort	Table S3	-	-	75	31	25	19	Fig 1j-l	30-70, 65	36:64%
3	St James, Dublin, Ireland	Plasma samples	Table S4	18	123	89		24	65	Fig 2a-f	21-71, 54	51:49%
3	St James, Dublin, Ireland	Whole blood stimulation	Table S4	19	27	17	6	4	7	Fig 3a-d, Fig 5, Fig 6	21-71, 54	51:49%
4	Hopital Cochin and Bichat, Paris	Whole blood stimulation	Table S5	24	-	31	-	11	20	Fig 3e-l	47-89, 42	32:68%
4	Hopital Cochin and Bichat, Paris	Cellular phenotyping	Table S5	29	-	31	-	11	20	Fig 4	47-89, 42	32:68%
Total				61	150	250
