# Supplementary material for: Defective type I interferon immunity is associated with increasing COVID-19 severity
Source: Research Square preprint supplement (doi:10.21203/rs.3.rs-1685544/v1), 2022-06-16
Supplement: Supplementary file 7 [file ffa0f0f5dc09789133aa8d2a.xlsx]

## Sheet: Table S6 Flow cytometry panel
Table S6 Flow cytometry panel applied to analyze intracellular IFNa and pIRF expression
Target	Fluorochrome	Clone/reference	Company
CD3	APC-H7	ref. 560176	BD
CD19	BV711	ref. 563036	BD
CD56	BV586	ref. 557747	BD
CD14	PE.cy7	ref. 561391	BD
CD16	PE-CF594	ref. 562293	BD
CD66b	Pacific Blue	ref. 562940	BD
HLA-DR	PerCP-cy5.5	ref. 339216	BD
CD1c	BUV395	ref. 742751	BD
BDCA2	AF700	ref. 354228	Biolegend
BDCA4	BV605	ref. 743130	BD
IFNα	PE	REA1013	Miltenyi Biotech
pIRF7	AF488	K47-671	BD
pIRF3	AF647	E7J8G	CST
